# Supplementary material for: Rheological behaviours of guar gum derivatives with hydrophobic unsaturated long-chains
Source: Royal Society of Chemistry journal article supplement (doi:10.1039/d0ra04322b), 2020-01-01
Supplement: d0ra04322b1.pdf [file d0ra04322b1.pdf]

## Supporting Information

# Rheological behaviors of guar gum derivatives with hydrophobic unsaturated long-chains

Minghua Zhang<sup>1,3</sup>, Jianping He<sup>3</sup>, Mingyu Deng<sup>3</sup>, Peixin Gong<sup>3</sup>, Xi Zhang<sup>2</sup>, Minmin Fan<sup>2</sup>, \* and Ke Wang<sup>2</sup>

<sup>1</sup> College of Polymer Science and Engineering, Sichuan University, Chengdu 610065, China; jianhua851250@163.com (M.Z.)

<sup>2</sup> Polymer Research Institute, Sichuan University, Chengdu 610065, China; fanminmin@scu.edu.cn (M.F.); zhangxi6352@163.com (X.Z.); wkestar@scu.edu.cn (K.W.)

<sup>3</sup> Jingkun Oilfield Chemistry Company, Kunshan 215300, China; hjpsy@vip.sina.com (J.H.); ksdmy@vip.sina.com (M.D.); gpx1025@163.com (P.G.)

\* Correspondence: fanminmin@scu.edu.cn (M.F.)

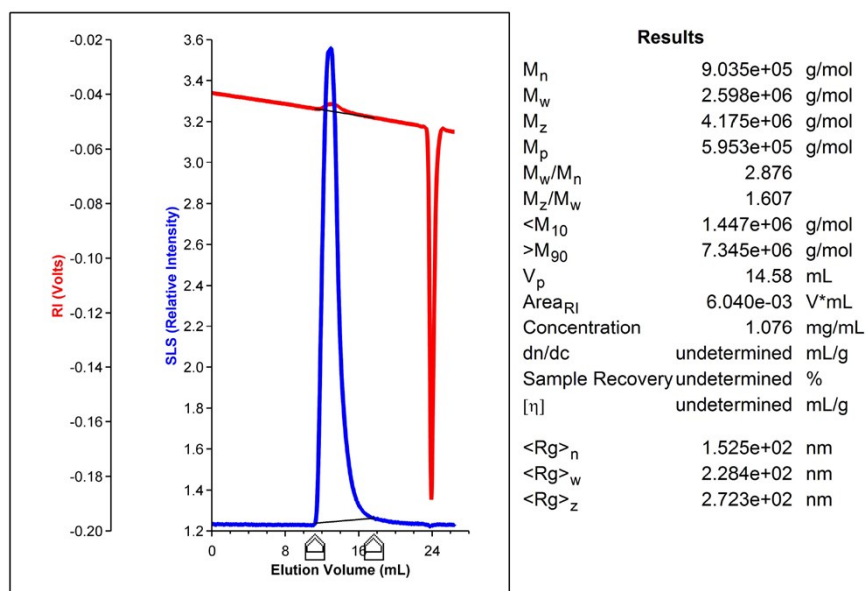

**Figure S1.** GPC spectrum of purified guar gum (concentration = 1 mg/mL; Flow rate = 0.6 mL/min; temperature = 25 °C).

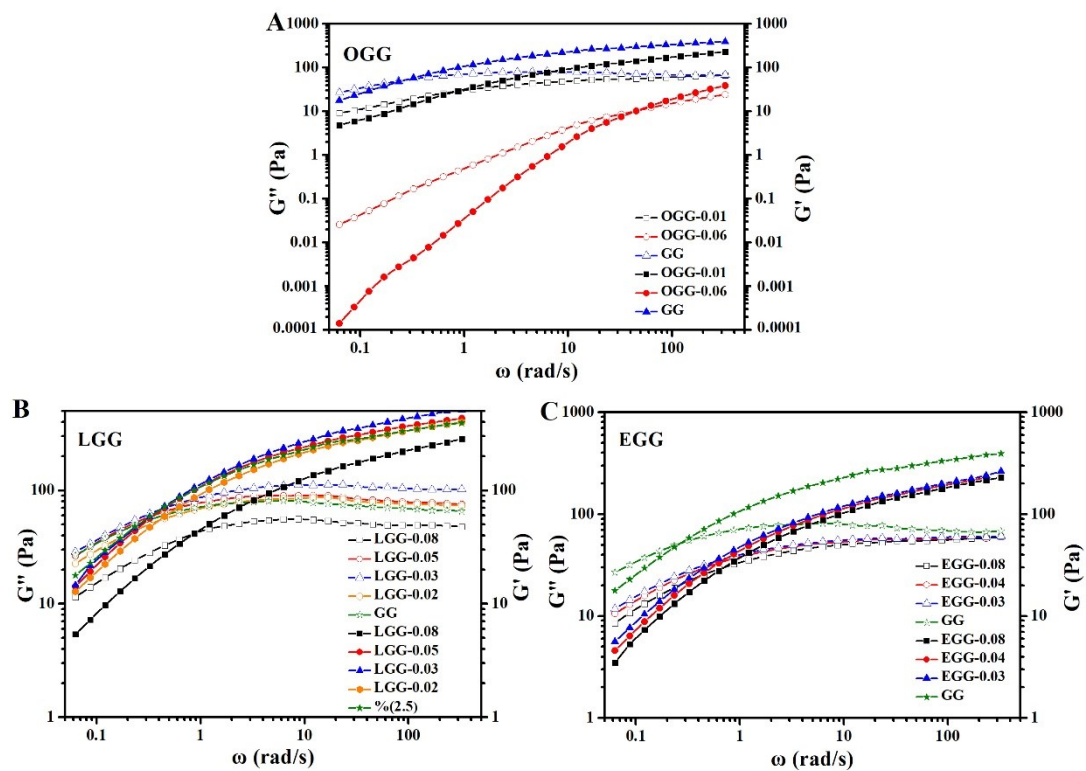

**Figure S2.** Elastic (Solid) and viscous modulus (Hollow) as a function of angular frequency for the aqueous solutions of (A) OGG, (B) LGG, and (C) EGG with different MS (concentration = 1.8 wt%; temperature = 25 °C; pH = 7.0).

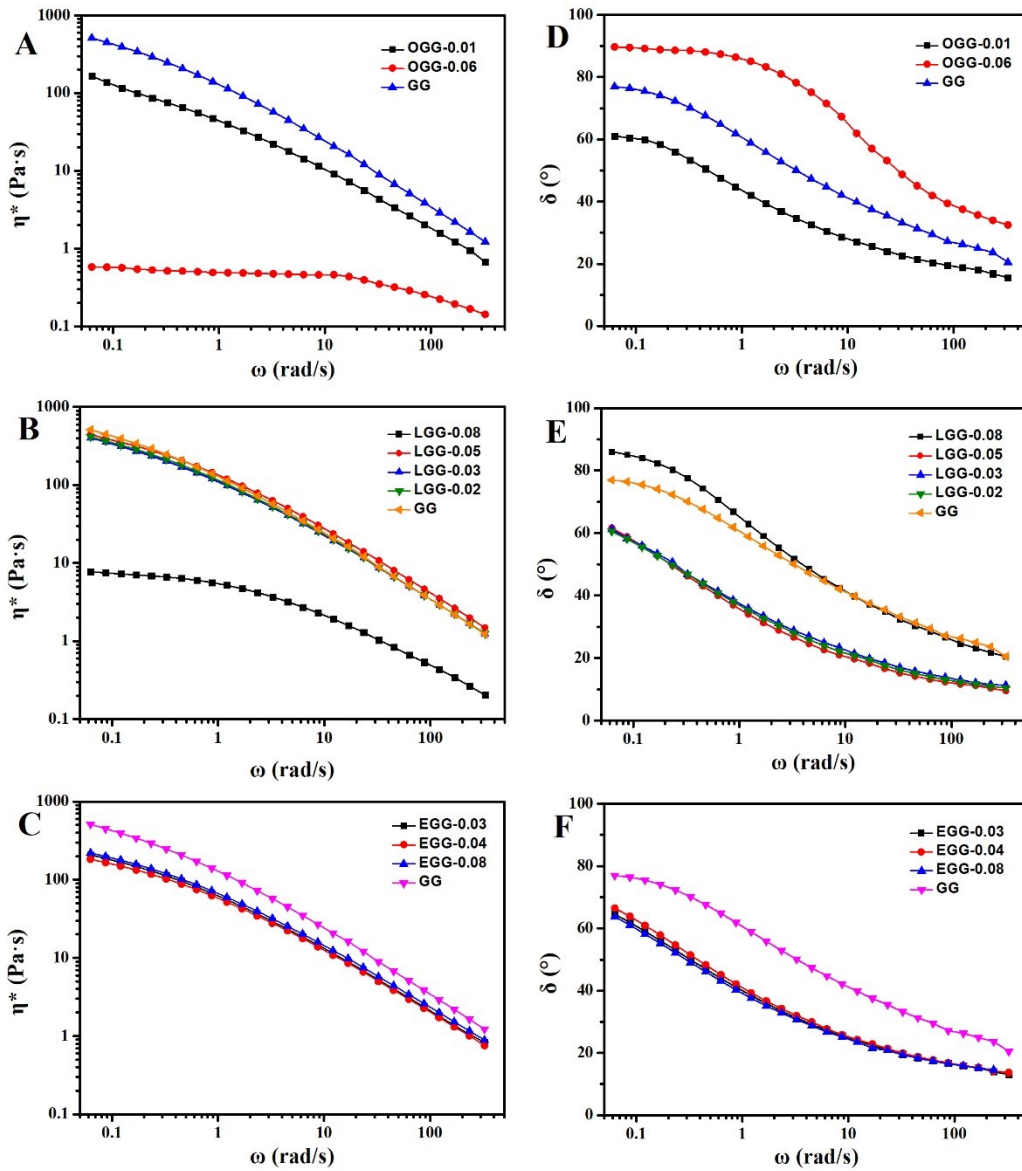

**Figure S3.** Dynamic complex viscosity ( $\eta^*$ ) (A-C) and dynamic loss angle ( $\delta$ ) (D-F) as a function of angular frequency ( $\omega$ ) for the aqueous solutions of (A, D) OGG, (B, E) LGG, and (C, F) EGG with different MS (concentration = 1.8 wt%; pH = 7.0; temperature = 25 °C).
